# Supplementary material
Source: PubMed Central journal article supplement (PMC7205516)
Supplement: NIHMS1065242-supplement-Supplementary_data.pdf [file NIHMS1065242-supplement-Supplementary_data.pdf]

## Supplementary material

### Web extra material—online supplement

This Supplementary material has been provided by the authors to give readers additional information about the work.

### Content

#### Sections

Methods

Results

Supplementary Figure 1: Study design

Supplementary Figure 2: Study design of biomarker analysis

Supplementary Table 1: Predefined immunohistochemistry biomarkers

Supplementary Table 2: Treatment-emergent adverse events (TEAEs) in safety population

Supplementary Table 3: Patient and tumour characteristics of intent-to-treat population

Supplementary Table 4: Correlation of tumour extent and lymph node status

Supplementary Table 5: Summary of cell density by treatment

Supplementary Figure 3: Association of the protein expression of markers of interest by study arm and tumour epithelial volume in the study population

Supplementary Table 6: Spearman correlation between estimated tumour epithelium volume and immunohistochemistry markers (weighted mean)

Supplementary Table 7: Comparison of markers of interest between treatment arms

## **Methods**

### ***Study design***

An institutional review board (IRB)-approved study was conducted at MD Anderson Cancer Center, Houston, Texas, USA, according to the Declaration of Helsinki and International Conference on Harmonisation's Guidelines for Good Clinical Practice (ClinicalTrials.gov: NCT01088529).

Eastern Cooperative Oncology Group performance status of  $\leq 1$  was required. Patients provided written informed consent.

We used computer-generated randomisation 2:1 to oral abiraterone acetate (AA; 1000 mg/d) and prednisone (P; 5 mg/d) for 3 mo plus intramuscular luteinising hormone-releasing hormone agonist (LHRHa; monthly or 3-monthly leuprolide acetate; AAP + LHRHa) or LHRHa only (LHRHa). We used this schema to limit the number of patients in the LHRHa arm, since it was not found beneficial.

The primary endpoint was pathologic  $\leq$  ypT2N0. The secondary endpoints included positive surgical margins, undetectable prostate-specific antigen (PSA;  $\leq 0.1$  ng/ml), and preoperative safety. Exploratory endpoints included quantitative tumour volume measures and associations with biochemical relapse. Following prostatectomy, we measured PSA at 8 wk and q3 mo for  $\geq 5$  yr.

Severity of adverse events (AEs) was reported according to the National Cancer Institute Common Terminology Criteria for Adverse Events, version 3.0.

### ***Pathology***

Two independent and blinded pathologists evaluated radical prostatectomy specimens and biomarker expression. Exploratory measures to evaluate residual tumour included tumour volume, tumour cell density, and tumour epithelium volume. We calculated tumour volume with three-dimensional estimation. Tumour cell density is the percentage of carcinoma cells in the largest tumour surface area and tumour epithelium volume (TEV) is tumour cell density multiplied by tumour volume.

### ***Biomarker analysis***

Biomarker analysis (Supplementary Fig. 2) included biomarkers evaluated by immunohistochemistry (Supplementary Table 1) and RNA (data not shown). We acquired

images of biomarkers using Olympus imaging system (Olympus Corporation, Center Valley, PA, USA). We recorded involvement as percentage tumour cells exhibiting detectable staining, intensity, and subcellular distribution.

We estimated proliferation by nuclear antigen Ki-67 and defined glucocorticoid receptor overexpression as  $\geq 10\%$  involvement of 3+ intensity.

### ***Intraprostatic hormone analysis***

We evaluated cortisol concentrations with an analysis of tissue by liquid chromatography–tandem mass spectrometry. We measured steroid panel from snap-frozen intraprostatic core biopsy samples, and carried out assessment in set pairs of unconjugated and 5-alpha reduced androgens as internal controls.

### ***Statistical analysis***

The sample size of 66 study patients (44 and 22 patients in the AAP + LHRHa arm and the LHRHa arm, respectively) provided 80% power to detect the difference of proportions of  $\leq pT2N0$  disease between arms, using a two-sided chi-square test at a significance level of 0.1. All patients in the intent-to-treat population were evaluated in the primary analysis. Patients who received at least one dose of study drug were assessed for safety.

We determined Spearman's correlation between residual tumours with biomarkers in each treatment arm and in overall population, and evaluated the association of measures of residual tumour with biomarkers by multivariate linear regression analysis of treatment, the biomarker, and interaction of treatment and the biomarker. We used the Kaplan-Meier method and the log-rank test for time-to-event analysis.

The median of normalised values for biomarkers in a group was used to determine the composite score for each patient by first calculating the standardised score for each biomarker's imputed and  $\log_2$ -transformed value across all patients using  $(\text{biomarker value} - \text{mean across all patients}) / (\text{standard deviation across all patients})$ , and then summarising the

standardised score of all genes in each group by the median value to generate a biomarker group composite score. Differences between biomarker levels were compared using the Wilcoxon ranked test.

The trial was monitored according to the sponsor's current Standard Operating Procedure for the Monitoring of Clinical Trials.

### ***Role of the funding source***

Employees of Janssen Research & Development participated in data monitoring and collection, data analysis, and writing of the report. The study sponsor provided grants to trial site, but had no involvement in the conduct of the trial. Analyses conducted by Janssen in support of this manuscript were funded by Janssen Global Services. The corresponding author had full access to all the data in the study and had final responsibility for the decision to submit.

### **Results**

Thirty-four men in the AAP + LHRHa arm (80%) and all patients in the LHRHa arm received the total 3 mo of treatment.

Sixty-six patients were enrolled, and one withdrew consent prior to treatment.

Pathology stage was positively associated with lymph node status ( $p < 0.0001$ ; Supplementary Table 3).

By all three exploratory quantitative tumour measures, residual tumour was significantly lower in the AAP + LHRHa arm than in the LHRHa arm (Fig. 1).

Median tumour volumes were 0.5 cc (range, 0.0–6.7 cc) and 2.6 (range, 0.1–6.3 cc) for the AAP + LHRHa and LHRHa arms, respectively ( $p = 0.0026$ ). Median tumour cell density was 35% (range, 1–75%) for the AAP + LHRHa arm and 70% (range, 50–85%) for the LHRHa arm ( $p < 0.0001$ ). Median tumour TEV was 0.1 cc (range, 0.0–4.8 cc) for the AAP + LHRHa arm and 1.6 cc (range, 0.0–4.6 cc) for the LHRHa arm ( $p = 0.0001$ ).

Five patients (11%) in the AAP + LHRHa arm had treatment-emergent AEs (TEAEs) leading to treatment discontinuation. No patients had TEAEs grade  $\geq 4$ .

One 74-yr-old patient in the AAP + LHRHa arm had a perioperative pulmonary embolism unrelated to study drugs, which resolved later. One LHRHa patient had pelvic bleeding. There was no increase in perioperative complications in either arm (data not shown). Fifty-Eight of 65 operated patients underwent laparoscopic robotic-assisted radical prostatectomy. Median blood loss in radical prostatectomies was 250 ml (range, 25–2000) in both treatment arms.

With regard to subsequent treatments, one patient in each treatment arm was given adjuvant radiation as per physician decision (ypT3bN0 stage).

Five patients (11%) in the AAP + LHRHa arm discontinued study treatment due to increased transaminase levels (grade 3 alanine aminotransferase increase). AA was interrupted for four patients because of gastrointestinal disorders ( $n = 2$ ) and hypertension ( $n = 2$ ).

Since the association of PSA recurrence with TEV was more significant than the association between recurrence and pathology stage ( $p = 0.01$ ; Table 3), we employed TEV for further analysis.

Protein findings presented aligned with the RNA analysis (data not shown).

**Supplementary Fig. 1 – Study design. Five patients in the AAP + LHRHa arms discontinued study treatment. One patient in the LHRHa arm did not undergo radical prostatectomy. AAP = abiraterone acetate plus prednisone; LHRHa = leuprolide acetate.**

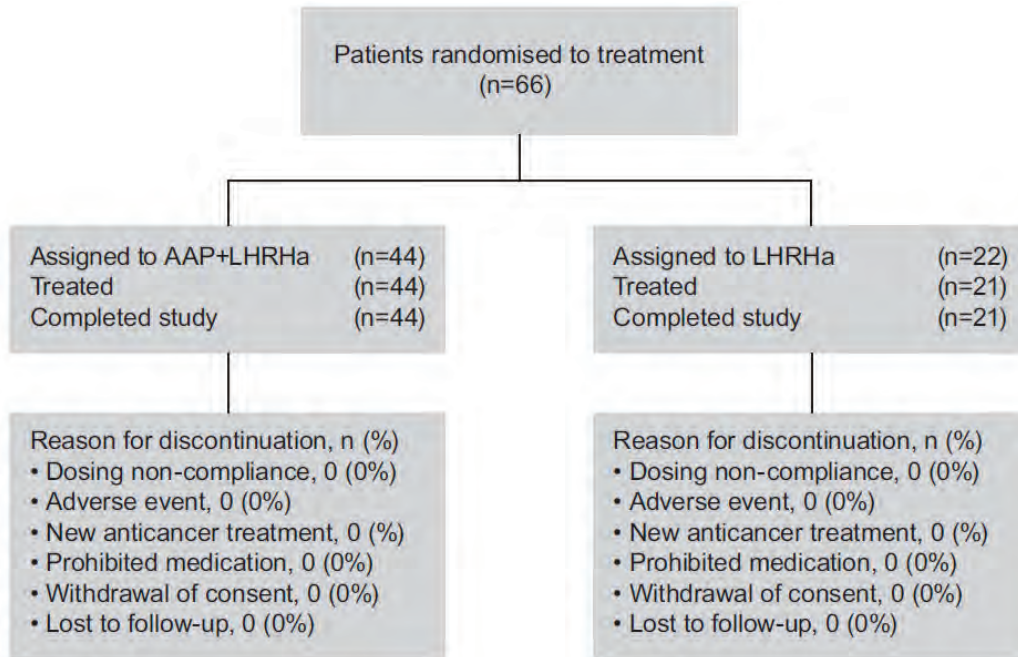

Supplementary Fig. 2 – Study design of biomarker analysis. AAP = abiraterone acetate plus prednisone; LHRH = luteinising hormone-releasing hormone; LHRHa = luteinising hormone-releasing hormone agonist.

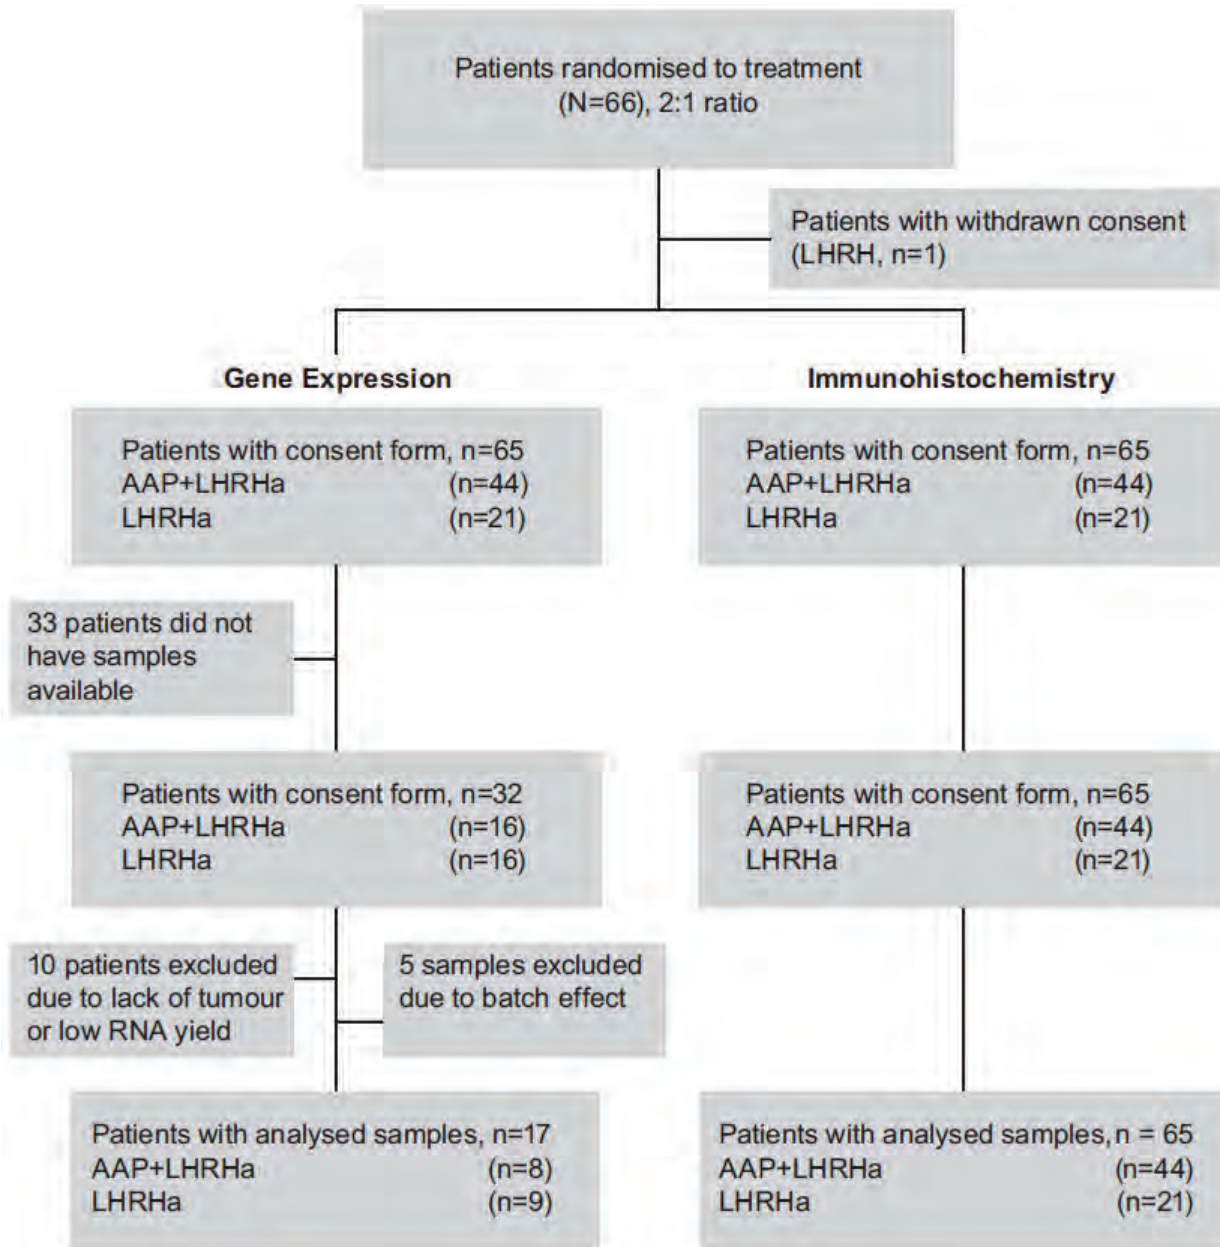

**Supplementary Table 1 – Predefined immunohistochemistry biomarkers**

| Antibody       | Dilution | Company                 | Catalogue no. |
|----------------|----------|-------------------------|---------------|
| AR             | 1/50     | DAKO                    | M3562         |
| ARv7           | 1/75     | Abcam                   | ab198394      |
| AR-C19         | 1/500    | Santa Cruz              | SC-815        |
| CYP17A1        | 1/300    | Novus Biologicals       | NB100-2842    |
| Phospho-cMET   | 1/175    | Novus Biologicals       | NBP1-40436    |
| Phospho-SRC    | 1/50     | Cell Signaling          | 2101          |
| PSA            | 1/2      | Ventana Medical Systems | 760-4271      |
| CD56           | 1/50     | DAKO                    | M7304         |
| Chromogranin A | 1/200    | DAKO                    | M0869         |
| GR             | 1/300    | BD Biosciences          | 61226         |
| Ki67           | 1/50     | DAKO                    | M7240         |
| ERG            | 1/50     | Biocare Medical         | CM421C        |
| NKX 3.1        | 1/500    | Athena Enzyme System    | 0314-16286    |
| Retinoblastoma | 1/50     | Calbiochem              | OP66          |
| P53            | 1/1000   | DAKO                    | M7001         |
| ATM            | 1/300    | GeneTex                 | GTX70103      |



**Supplementary Table 2 – Treatment-emergent adverse events (TEAEs) in safety population**

|                                                                                    | AAP + LHRHa (n = 44) |          |         | LHRHa (n = 21) |                      |         |
|------------------------------------------------------------------------------------|----------------------|----------|---------|----------------|----------------------|---------|
| No. of patients with TEAEs (%) <sup>a</sup>                                        | 44 (100)             |          |         | 21 (100)       |                      |         |
| No. of patients with grade 3 TEAEs (%) <sup>a</sup>                                | 17 (38.6)            |          |         | 5 (23.8)       |                      |         |
| No. of patients with TESAEs (%) <sup>a</sup>                                       | 2 (4.5)              |          |         | 2 (9.5)        |                      |         |
| No. of patients with TEAEs leading to treatment discontinuation (%) <sup>a,b</sup> | 5 (11.4)             |          |         | 0              |                      |         |
| <b>Most frequent TEAEs, n (%)<sup>c</sup></b>                                      | Grade 1/2            | Grade 3§ | Total   | Grade 1/2      | Grade 3 <sup>d</sup> | Total   |
| Hot flush                                                                          | 37 (84)              | 0        | 37 (84) | 18 (86)        | 0                    | 18 (86) |
| Anaemia                                                                            | 23 (52)              | 0        | 23 (52) | 8 (38)         | 0                    | 8 (38)  |
| Fatigue                                                                            | 18 (41)              | 1 (2)    | 19(43)  | 8(38)          | 2(10)                | 10 (48) |
| ALT increase                                                                       | 15 (34)              | 7 (16)   | 22 (50) | 7 (33)         | 0                    | 7 (33)  |
| AST increase                                                                       | 16 (36)              | 1 (2)    | 17 (39) | 7 (33)         | 0                    | 7 (33)  |
| Hypertension                                                                       | 2 (5)                | 8 (18)   | 10 (23) | 1 (5)          | 2 (10)               | 3 (14)  |
| Hypercholesterolaemia                                                              | 9 (21)               | 0        | 9 (21)  | 5 (24)         | 0                    | 5 (24)  |
| Hyperglycaemia                                                                     | 9 (21)               | 0        | 9 (21)  | 3 (14)         | 0                    | 3 (14)  |
| Hyperbilirubinemia                                                                 | 8 (18)               | 0        | 8 (18)  | 1 (5)          | 0                    | 1 (5)   |
| Insomnia                                                                           | 3 (7)                | 0        | 3 (7)   | 5 (24)         | 1 (5)                | 6 (29)  |

AA = abiraterone acetate; ALT = alanine aminotransferase; AST = aspartate aminotransferase; LHRHa = luteinising hormone-releasing hormone agonist; P = prednisone; TESAe = treatment-emergent serious adverse event.

<sup>a</sup> Adverse events with toxicity grade 5 are not included.

<sup>b</sup> Discontinuation of study medication includes discontinuation of any of the study drugs (AA, P, or LHRHa).

<sup>c</sup> TEAE in ≥15% of patients in either treatment group.

<sup>d</sup> No grade 4 TEAEs were observed.

**Supplementary Table 3 – Patient and tumour characteristics of intent-to-treat population**

|                                                           | Intent-to-treat   |                     |                     |
|-----------------------------------------------------------|-------------------|---------------------|---------------------|
|                                                           | AAP + LHRHa       | LHRHa               | Total               |
| <i>N</i>                                                  | 44                | 22                  | 66                  |
| Age (yr), median (range)                                  | 62 (46–73)        | 60 (42–75)          | 61 (42–75)          |
| Days from initial diagnosis to first dose, median (range) | 49 (1–889)        | 42 (14–512)         | 48 (1–889)          |
| PSA pretreatment (ng/ml), median (range)                  | 9.9<br>(1.6–69.0) | 12.4<br>(4.8–118.8) | 11.4<br>(1.6–118.8) |
| ECOG PS, <i>n</i> (%)                                     |                   |                     |                     |
| 0                                                         | 39 (88.6)         | 15 (68.2)           | 54 (81.8)           |
| 1                                                         | 5 (11.4)          | 7 (31.8)            | 12 (18.2)           |
| Clinical stage, <i>n</i> (%)                              |                   |                     |                     |
| T1                                                        | 9 (20.5)          | 3 (13.6)            | 12 (18.2)           |
| T2                                                        | 32 (72.7)         | 17 (77.3)           | 49 (74.2)           |
| T3                                                        | 3 (6.8)           | 1 (4.5)             | 4 (6.1)             |
| Gleason score at initial diagnosis, <i>n</i> (%)          |                   |                     |                     |
| 7 (3 + 4)                                                 | 0                 | 3 (13.6)            | 3 (4.5)             |
| 7 (4 + 3)                                                 | 4 (9.1)           | 3 (13.6)            | 7 (10.6)            |
| 8                                                         | 21 (47.7)         | 10 (45.5)           | 31 (47.0)           |
| ≥9                                                        | 19 (43.2)         | 6 (27.3)            | 25 (37.9)           |

AAP = abiraterone acetate plus prednisone; ECOG PS = Eastern Cooperative Oncology Group performance status; LHRHa = luteinising hormone-releasing hormone agonist; PSA = prostate-specific antigen.

**Supplementary Table 4 – Correlation of tumour extent and lymph node status**

| Pathological stage |          | Lymph node status |          | <i>p</i> value <sup>a</sup> |
|--------------------|----------|-------------------|----------|-----------------------------|
|                    |          | N0                | N1 or N2 |                             |
| ypT2               | <i>N</i> | 0.28              | 0.4      | <0.0001                     |
|                    | %        | 65.9              | 14.3     |                             |
| ypT3 or T4         | <i>N</i> | 0.14              | 0.19     | <0.0001                     |
|                    | %        | 34.1              | 85.7     |                             |

Correlation percentage represents the correlation ratio on how pathological stage and lymph node status are related. The higher the correlation percentage, the more closely related the variables.

<sup>a</sup> *p* value is based on the Fisher exact test.

**Supplementary Table 5 – Summary of cell density by treatment**

|                               | AAP + LHRHa      | LHRHa                | Total            | <i>p</i> value <sup>a</sup> |
|-------------------------------|------------------|----------------------|------------------|-----------------------------|
| <i>N</i>                      | 44               | 21                   | 65               |                             |
| Tumour volume (cc)            |                  |                      |                  |                             |
| Median (range)                | 0.5<br>(0.0–6.7) | 2.6<br>(0.1–6.3)     | 1.0<br>(0.0–6.7) | 0.0026                      |
| Tumour cell density (%)       |                  |                      |                  |                             |
| Median (range)                | 35.0 (1.0–75.0)  | 70.0 (50.0–<br>85.0) | 55.0 (1.0–85.0)  | <0.0001                     |
| Tumour epithelium volume (cc) |                  |                      |                  |                             |
| Median (range)                | 0.1 (0.0–4.8)    | 1.6 (0.0–4.6)        | 0.5 (0.0–4.8)    | 0.0001                      |

AAP = abiraterone acetate plus prednisone; LHRHa = luteinising hormone-releasing hormone agonist.

<sup>a</sup> *p* values are based on the Wilcoxon rank sum test for continuous cellularity data.

**Supplementary Fig. 3 – Association of the protein expression of markers of interest by study arm and tumour epithelial volume in the entire study population. AAP = abiraterone acetate plus prednisone; ARV7 = androgen receptor splice variant; GR = glucocorticoid receptor; LHRHa = luteinising hormone-releasing hormone agonist.**

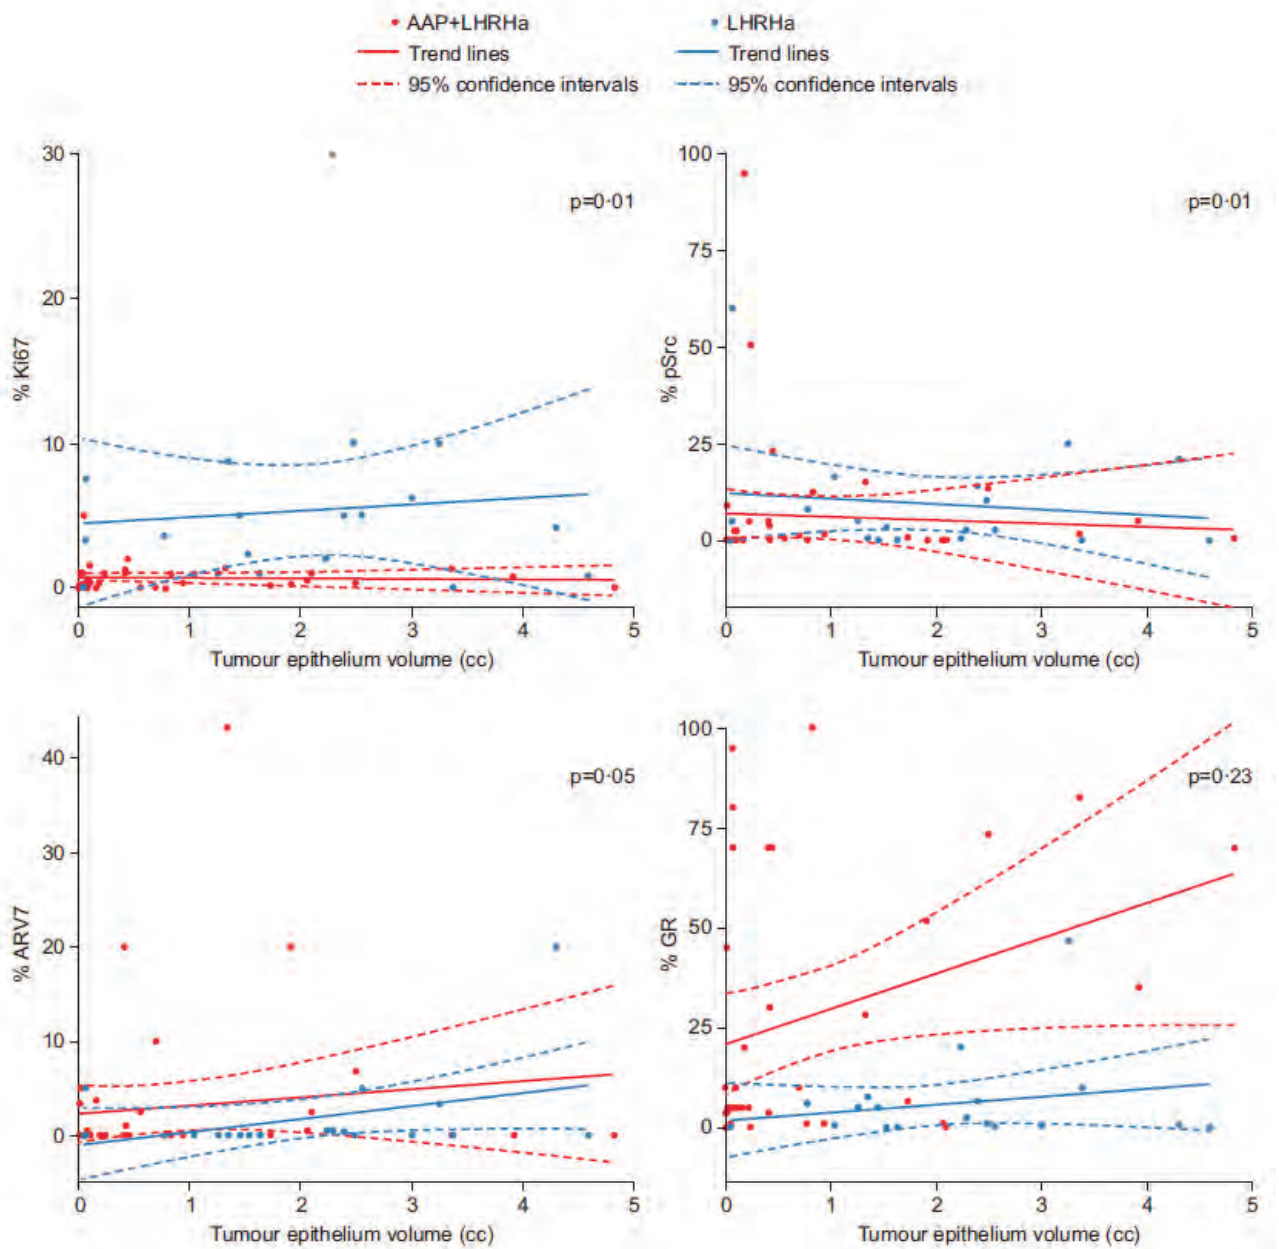

**Supplementary Table 6 – Spearman correlation between estimated tumour epithelium volume and immunohistochemistry markers (weighted mean)**

|       | AAP + LHRHa |                |          | LHRHa       |                |          | Total       |                |          |
|-------|-------------|----------------|----------|-------------|----------------|----------|-------------|----------------|----------|
|       | Correlation | <i>p</i> value | <i>n</i> | Correlation | <i>p</i> value | <i>n</i> | Correlation | <i>p</i> value | <i>n</i> |
| PSA   | 0.24939     | 0.1158         | 41       | -0.31001    | 0.1835         | 20       | 0.29676     | 0.0202         | 61       |
| nARv7 | 0.27439     | 0.0825         | 41       | 0.33227     | 0.1523         | 20       | 0.22631     | 0.0795         | 61       |
| GR    | 0.37629     | 0.0182         | 39       | 0.14740     | 0.5352         | 20       | 0.15737     | 0.2339         | 59       |
| p-Src | 0.49280     | 0.0011         | 41       | -0.00266    | 0.9911         | 20       | 0.40567     | 0.0012         | 61       |

AAP = abiraterone acetate plus prednisone; GR = glucocorticoid receptor; LHRHa = luteinising hormone-releasing hormone agonist; nARv7 = nuclear expression of androgen receptor splice variant 7; PSA = prostate-specific antigen.

**Supplementary Table 7 – Comparison of markers of interest between treatment arms**

| Table 2 markers | Treatment arm | 1st quartile | Median | Mean   | 3rd quartile | SD   | <i>p</i> value |
|-----------------|---------------|--------------|--------|--------|--------------|------|----------------|
| AR-N            | LHRHa         | 44.25        | 68     | 65.31  | 90.92        | 28.5 | 0.05           |
|                 | AAP + LHRHa   | 10           | 50     | 46.39  | 72.5         | 35.1 |                |
| PSA             | LHRHa         | 41.46        | 74.55  | 66.26  | 93           | 29.6 | 0.008          |
|                 | AAP + LHRHa   | 1            | 20     | 31.51  | 55           | 32.7 |                |
| nARV7           | LHRHa         | 0            | 0      | 1.733  | 0.5          | 4.6  | 0.99           |
|                 | AAP + LHRHa   | 0            | 0      | 2.902  | 1            | 7.9  |                |
| GR              | LHRHa         | 0            | 0.8333 | 5.625  | 6.167        | 10.8 | 0.008          |
|                 | AAP + LHRHa   | 2.333        | 6.5    | 27.89  | 60.83        | 33.5 |                |
| pSRC            | LHRHa         | 0.375        | 4.167  | 9.455  | 14.25        | 14.1 | 0.02           |
|                 | AAP + LHRHa   | 0            | 0      | 6.061  | 3.75         | 16.8 |                |
| Ki67            | LHRHa         | 1            | 3.883  | 5.337  | 6.562        | 6.6  | 0.008          |
|                 | AA + LHRHa    | 0            | 0.4167 | 0.6952 | 1            | 0.89 |                |

AAP = abiraterone acetate plus prednisone; GR = glucocorticoid receptor; LHRHa = luteinising hormone-releasing hormone agonist; nARv7 = nuclear expression of androgen receptor splice variant 7; PSA = prostate-specific antigen; SD = standard deviation.
